# Supplementary material for: Improved electrochemical and photovoltaic performance of dye sensitized solar cells based on PEO/PVDF–HFP/silane modified TiO2electrolytes and MWCNT/Nafion®counter electrode
Source: Royal Society of Chemistry journal article supplement (doi:10.1039/c5ra01770j), 2015-01-01
Supplement: c5ra01770j1.pdf [file c5ra01770j1.pdf]

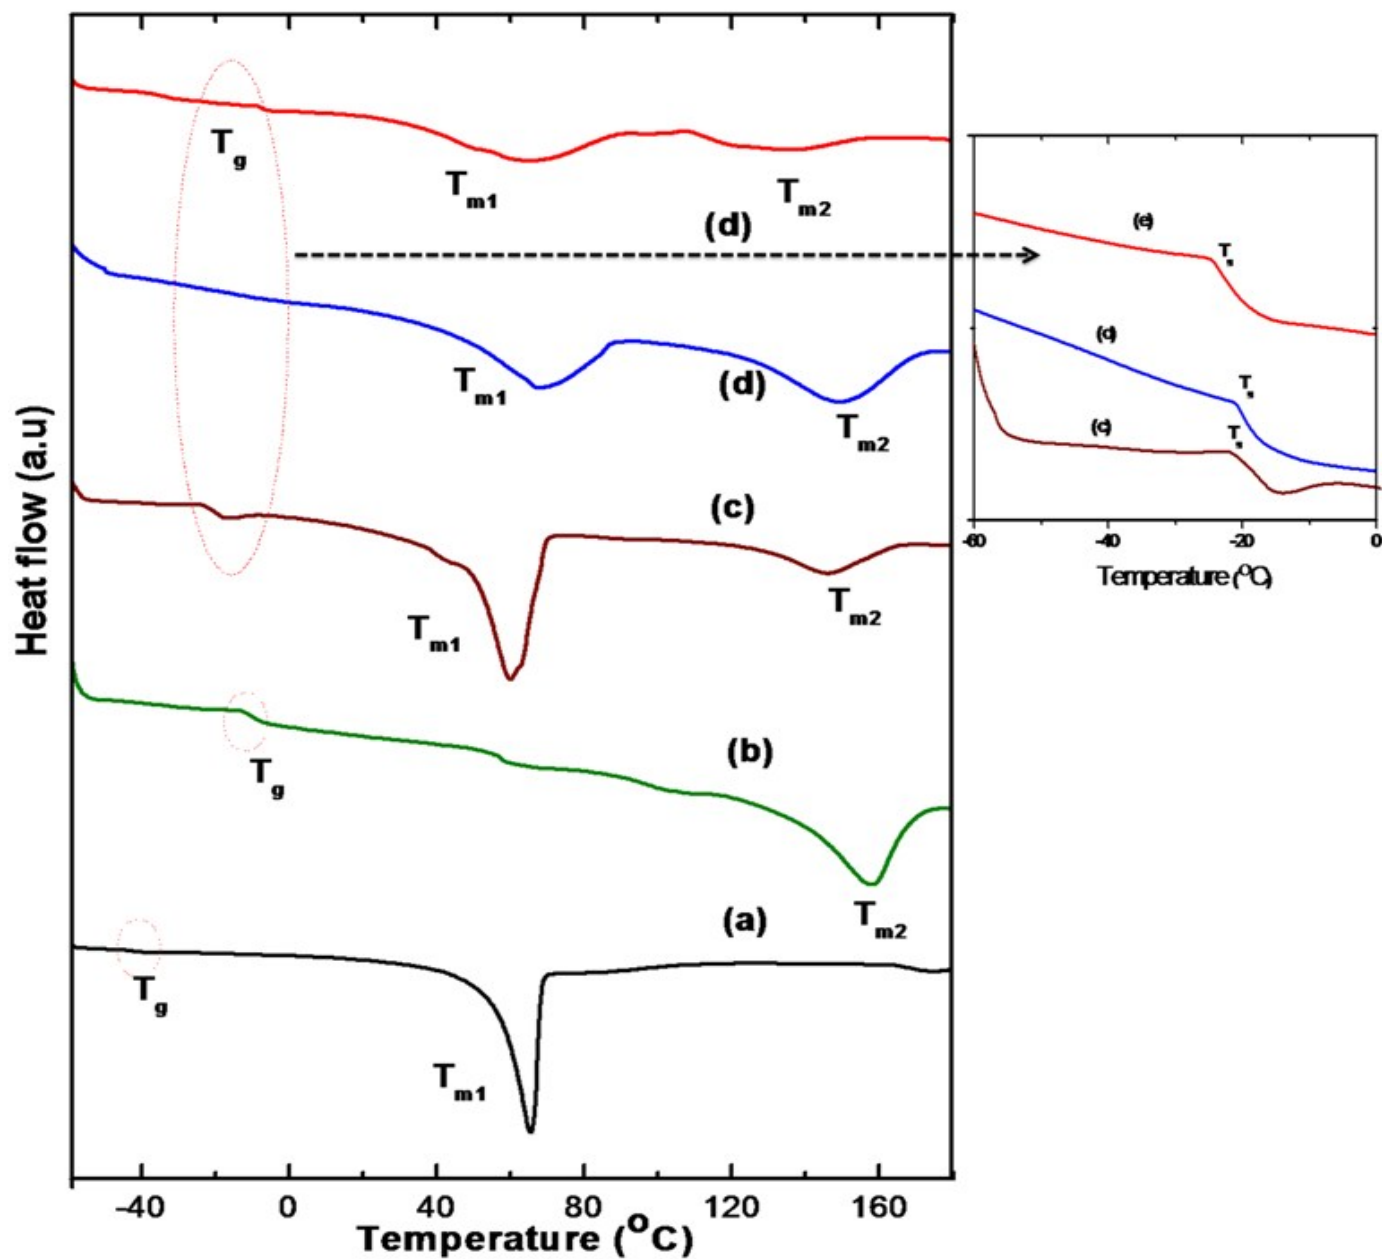

Fig. s1†. DSC thermograms of (a) PEO (b) PVDF-HFP (c) PEO/PVDF-HFP (d) PVDF-HFP/U-TiO<sub>2</sub> and (e) PEO/PVDF-HFP/M-TiO<sub>2</sub>

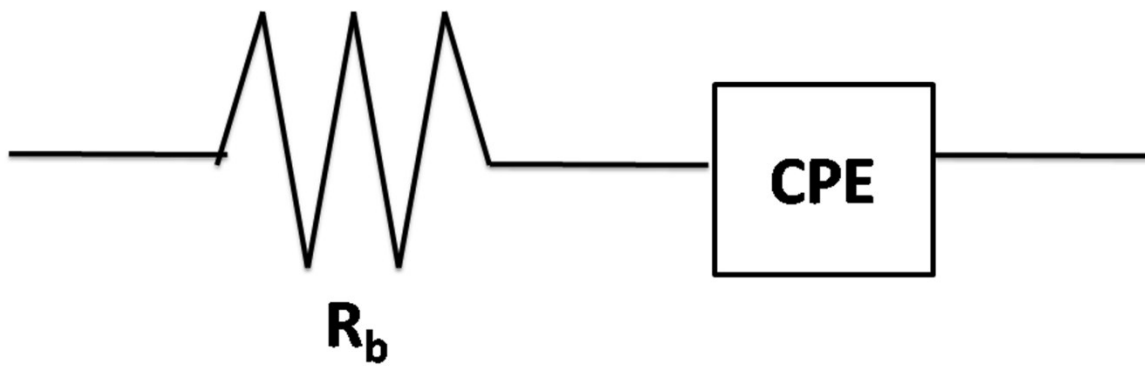

**Fig. s2†. Equivalent circuit for fitting the electrochemical impedance data**

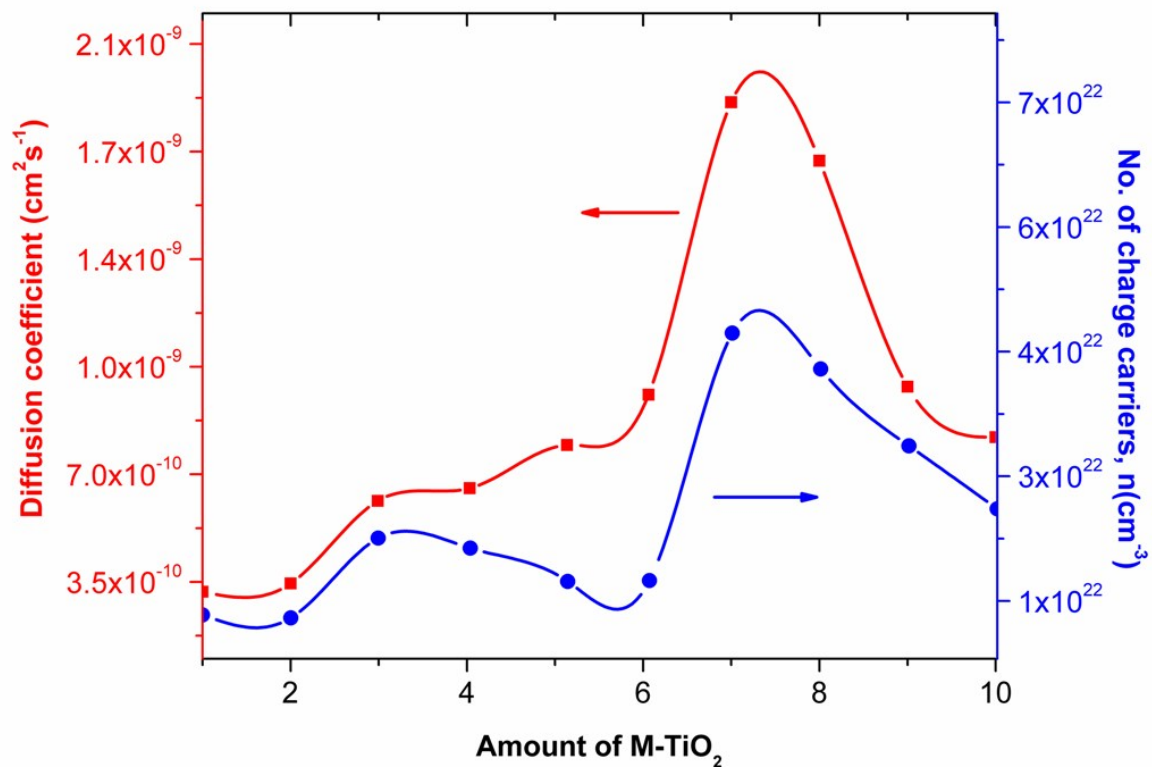

**Fig. s3†. Diffusion Coefficient and No. of charge carriers of PEO/PVDF-HFP electrolyte membrane with different amount of silane treated TiO<sub>2</sub> nanoparticles**

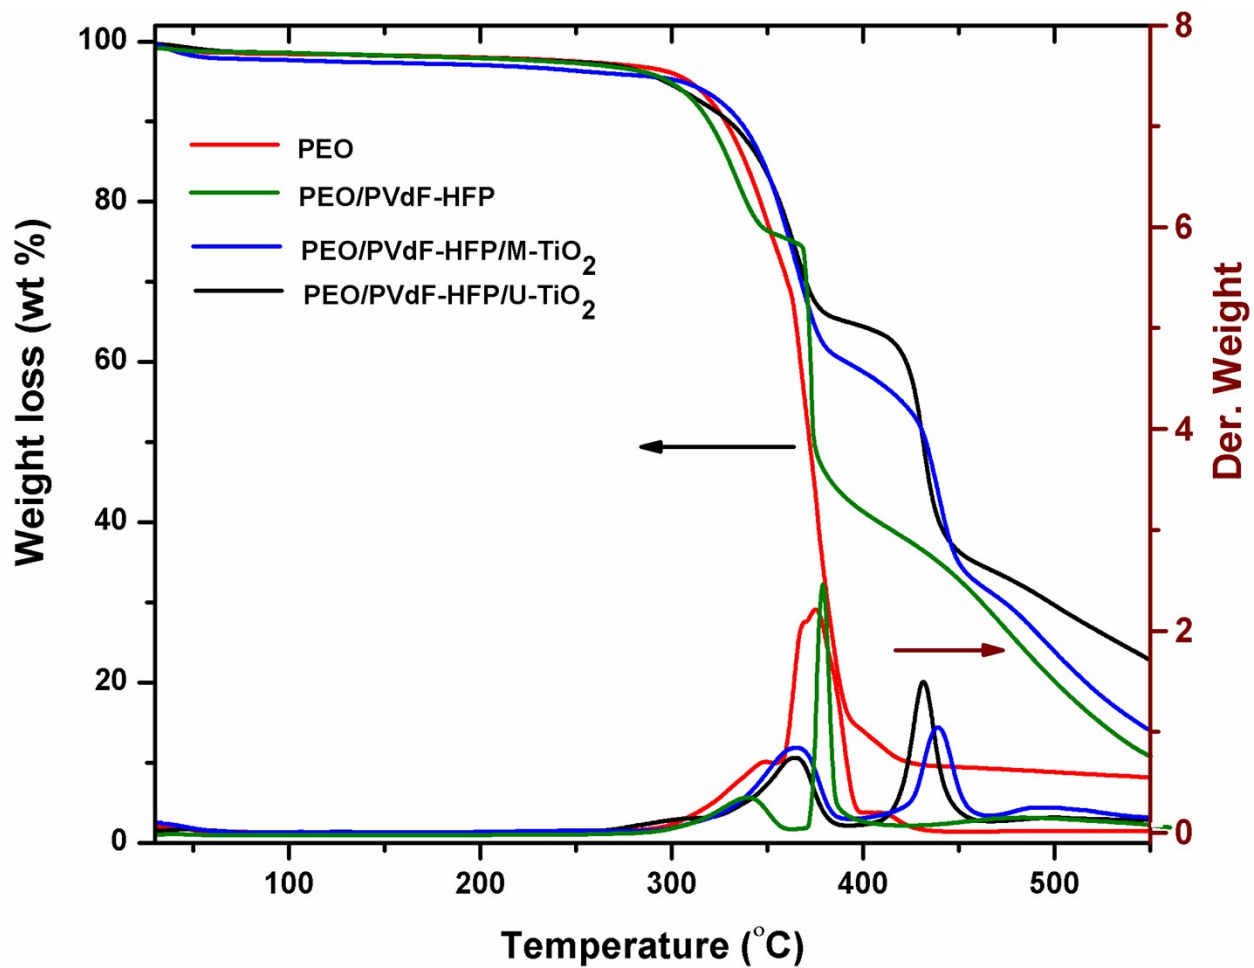

Fig.s4†. TGA and DTA curve of polymer electrolyte membranes

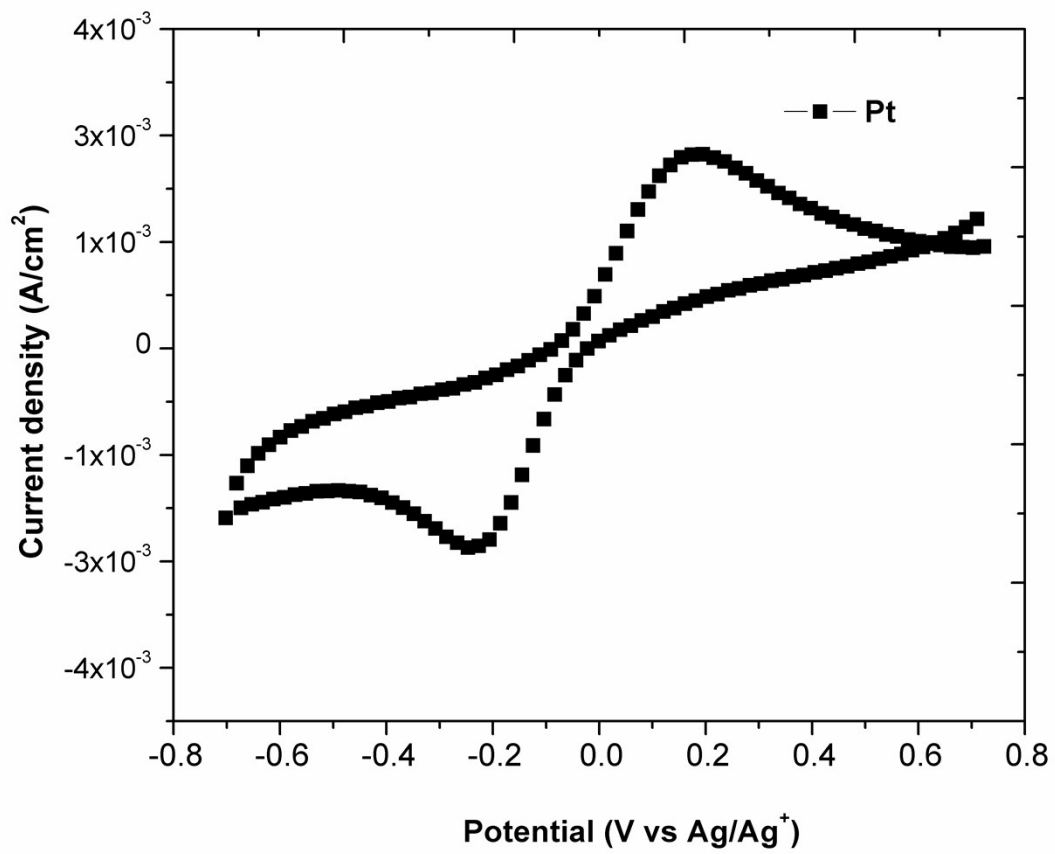

**Fig.s5†. Cyclic voltammetry studies of Pt counter electrodes**

**Table. S1†.** The parameters obtained by fitting the impedance spectra of DSSC by using the equivalent circuit is given in Fig.(inset)

| <b>Electrolyte</b> | <b>PEO/PVdF-HFP</b> | <b>PEO/PVdF-HFP/U-TiO<sub>2</sub></b> | <b>PEO/PVdF-HFP/M-TiO<sub>2</sub></b> |
|--------------------|---------------------|---------------------------------------|---------------------------------------|
| $R_{ct1}/ \Omega$  | 34                  | 33                                    | 31                                    |
| $R_{ct2}/ \Omega$  | 120                 | 110                                   | 96                                    |
| $R_{diff}/ \Omega$ | 60                  | 53                                    | 37                                    |
